# Supplementary material for: Visualization of the Dynamics of Photoinduced Crawling Motion of 4-(Methylamino)Azobenzene Crystals via Diffracted X-ray Tracking
Source: MDPI journal article supplement (doi:10.3390/ijms242417462), 2023-12-14
Supplement: s1 [file s1]

## Supporting Information

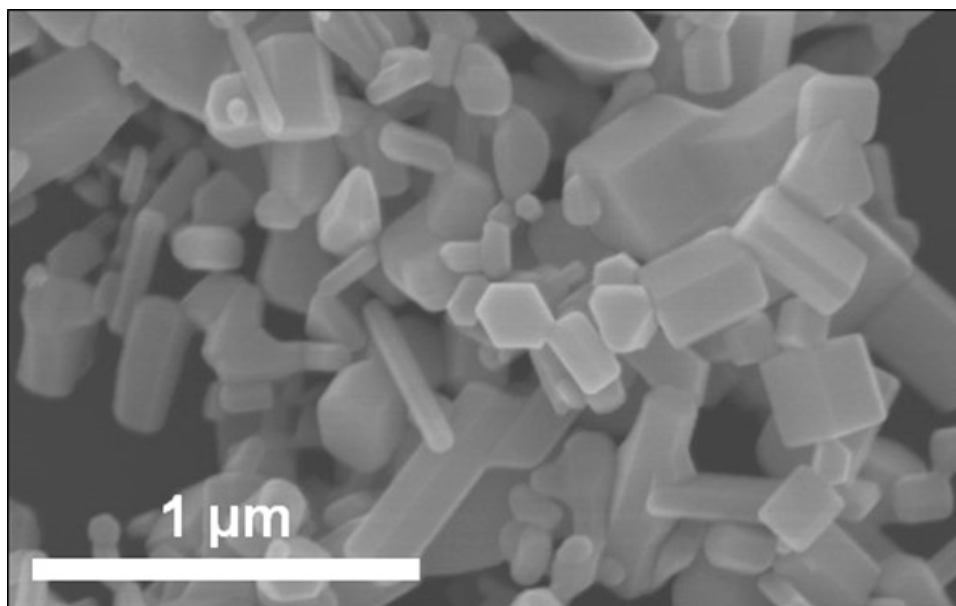

**Figure S1.** A scanning electron microscopy image of the zinc oxide nanoparticles used in the experiments.

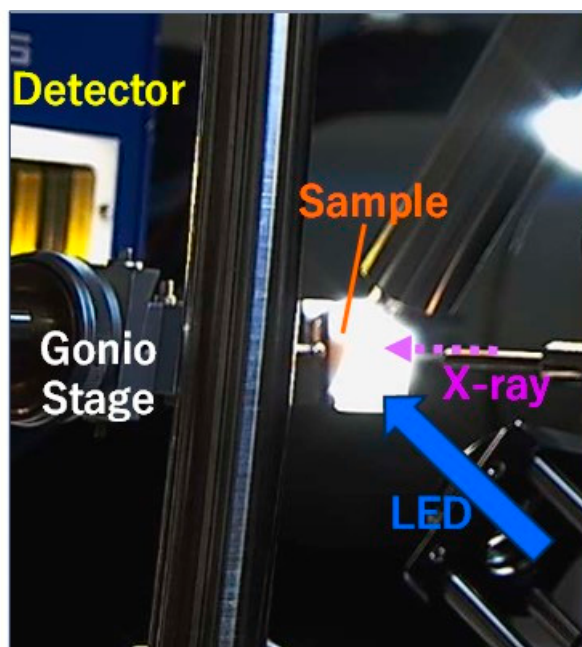

**Figure S2.** A photographic image of the XRD measurement setup. Diffraction X-rays transmitted through the sample were detected.

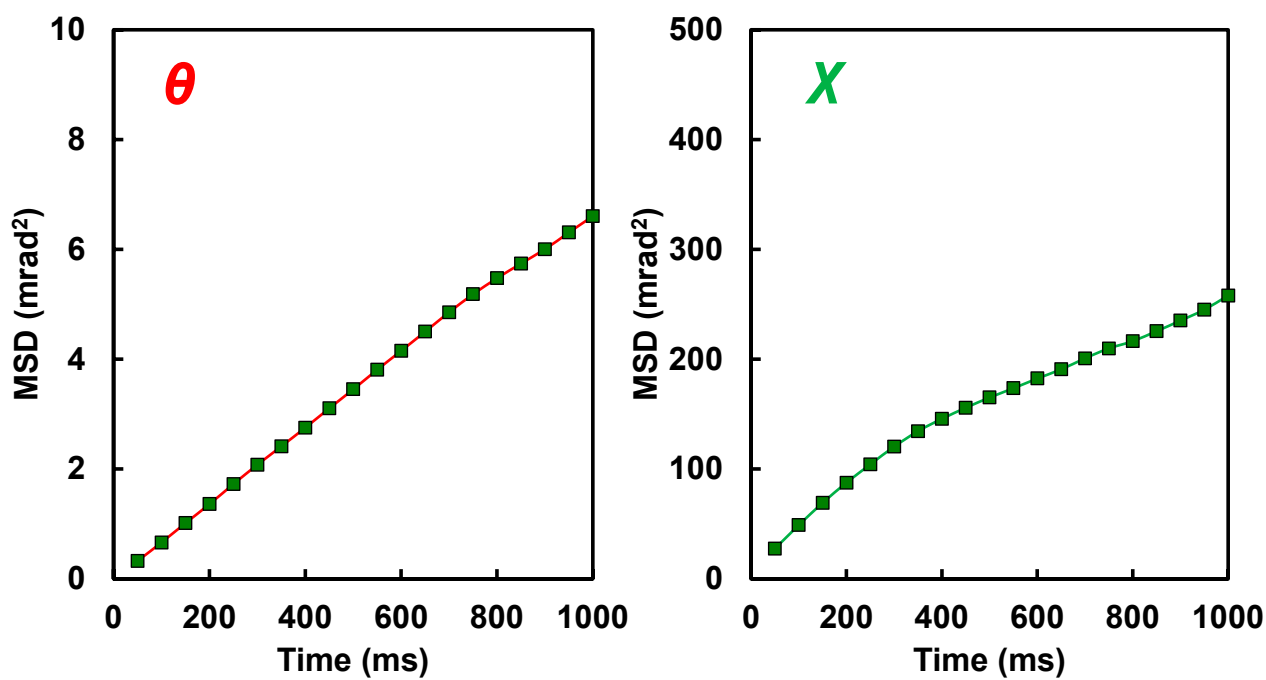

**Figure S3.** MSD curves excluding the rotational displacement at the moment when the 4-MAAB crystalline film completely melted at the light intensity 200 mW cm<sup>-2</sup>.

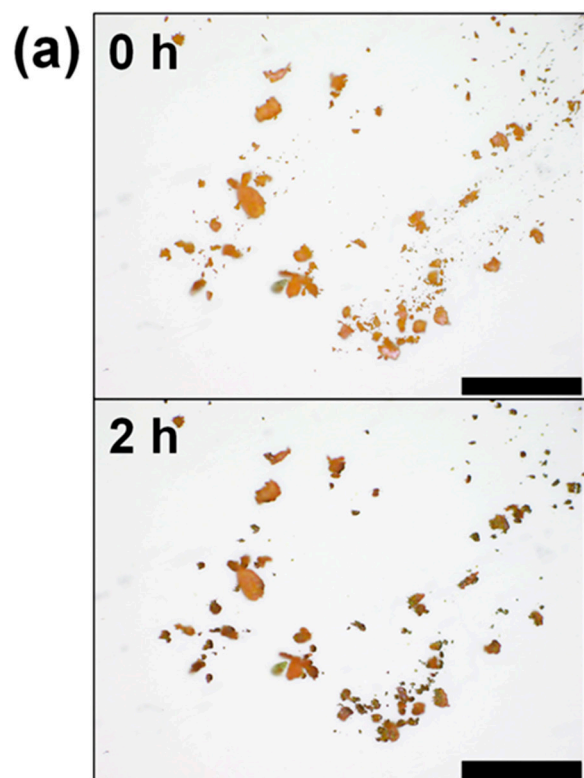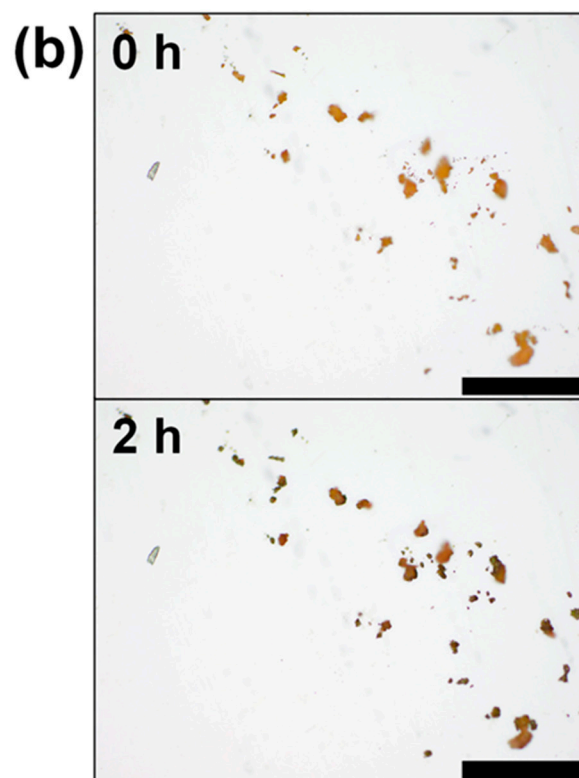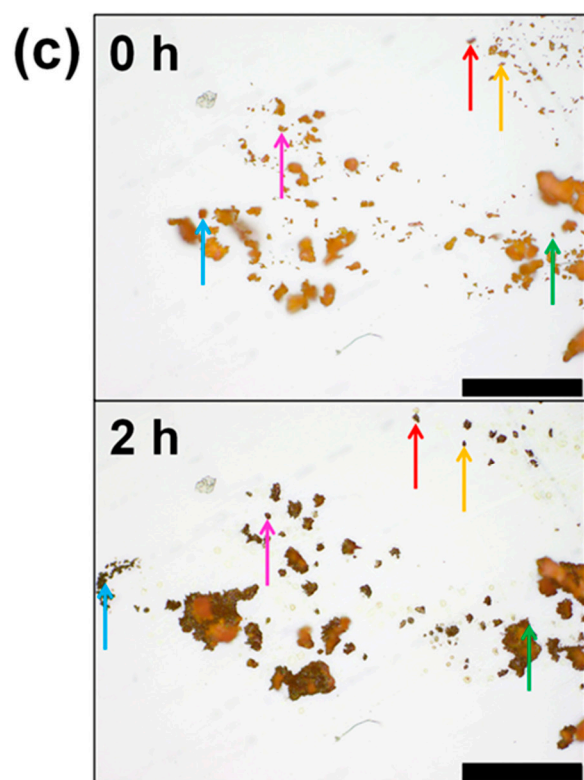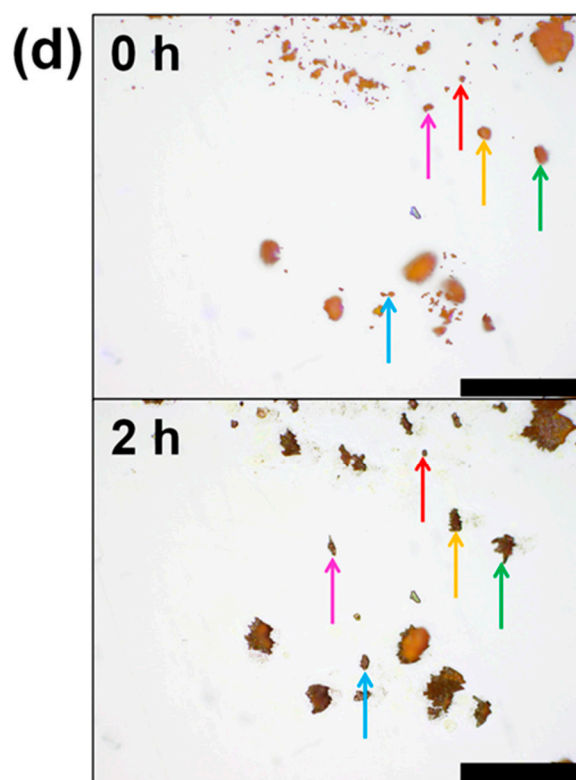

**Figure S4.** (a-d) Optical microscope images of 4-MAAB crystals on polyimide films before and after light irradiation at the light intensity (a) 50, (b) 100, (c) 200, and (d) 300 mW cm<sup>-2</sup> (scale bar: 200  $\mu$ m). Blue LED light was irradiated for 2 h. The arrows shown in Figure 1c, d point to 4-MAAB crystals that exhibited photo-induced crawling motion.

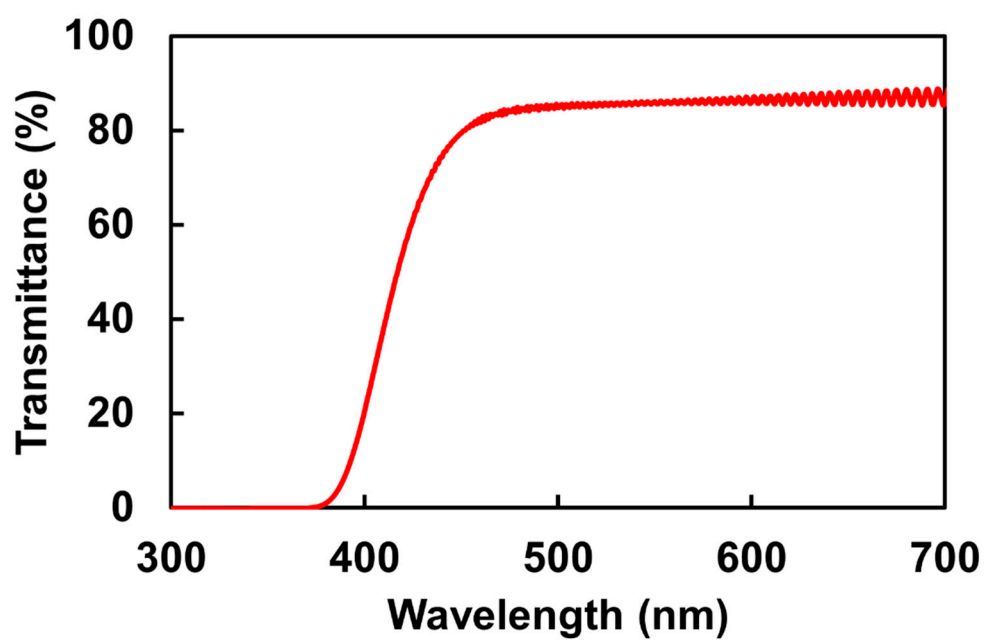

Figure S5. Transmittance spectrum of the polyimide film used in the experiment.

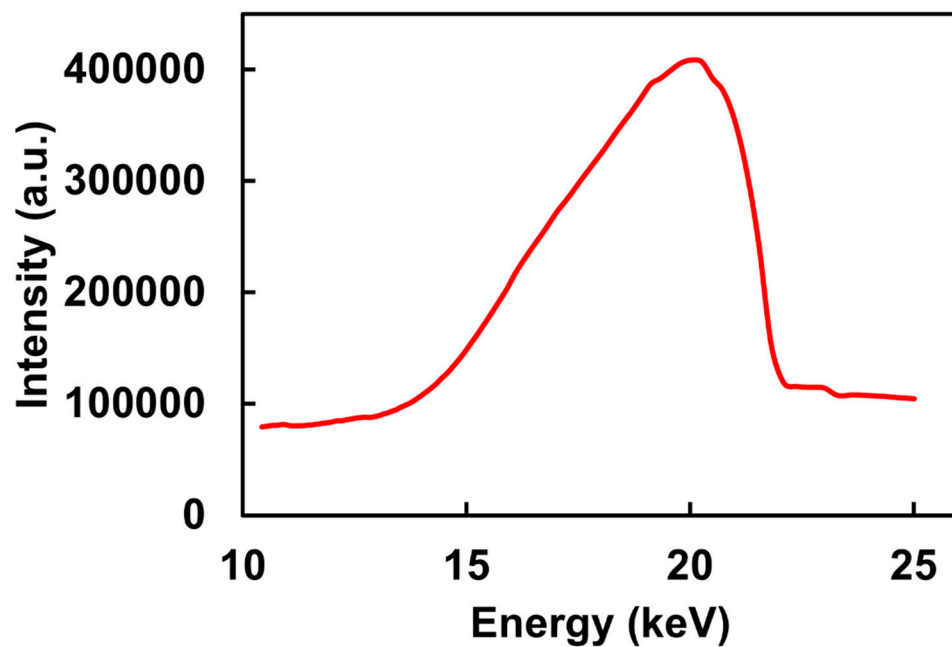

Figure S6. An intensity spectrum of the white X-ray.

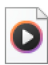

Movie\_S1.mp4

**Movie S1.** Time-resolved XRD pattern of 4-MAAB powder crystals containing ZnO nanoparticles under 200 mW cm<sup>-2</sup> blue light irradiation. (Video fast-forwarded 5 × compared to real time; MP4)

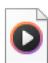

Movie\_S2.mp4

**Movie S2.** Melting behavior of a 4-MAAB crystalline thin film containing ZnO nanoparticles under under 200 mW cm<sup>-2</sup> blue light irradiation. (Video fast-forwarded 5 × compared to real time; MP4)

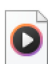

Movie\_S3.mp4

**Movie S3.** Time-resolved XRD pattern of a 4-MAAB crystalline thin film containing ZnO nanoparticles under 200 mW cm<sup>-2</sup> blue light irradiation. (Video fast-forwarded 5 × compared to real time; MP4)
