# Supplementary material for: Visualization of the Dynamics of Photoinduced Crawling Motion of 4-(Methylamino)Azobenzene Crystals via Diffracted X-ray Tracking
Source: Int J Mol Sci. 2023 Dec 14;24(24):17462. doi: 10.3390/ijms242417462 (PMC10744157; doi:10.3390/ijms242417462)
Supplement: Supplementary file 1 [file ijms-24-17462-s001.zip]

Archive with 4 entries (4 files):
- ijms-2719758-supplementary.pdf
- Movie S1.mp4
- Movie S2.mp4
- Movie S3.mp4
